# Supplementary material
Source: PubMed Central journal article supplement (PMC6484584)
Supplement: jamanetwopen-2-e187223-s001.pdf [file jamanetwopen-2-e187223-s001.pdf]

## Supplementary Online Content

Feng Q, Wei W-Q, Chaugai S, et al. Association between low-density lipoprotein cholesterol levels and risk for sepsis among patients admitted to the hospital with infection. *JAMA Netw Open*. 2019;2(1):e187223. doi:10.1001/jamanetworkopen.2018.7223

**eMethods.** Data Sources and Analyses

**eReferences**

**eFigure.** Outline of Cohort Identification

**eTable 1.** List of *ICD-9* Codes to Identify Individuals Hospitalized With Infection

**eTable 2.** List of Antibiotics

**eTable 3.** Exclusion Codes

**eTable 4.** Codes for Identification of Organ Failure

**eTable 5.** PheCode Algorithms for Generating Comorbidity Covariates

**eTable 6.** Manual Review to Confirm Sepsis Algorithm

**eTable 7.** Variants Used to Generate GLGC-Based LDL-C Genetic Risk Score

**eTable 8.** Sensitivity Analyses in Subcohort With Measured LDL-C

**eTable 9.** Associations Between Closest LDL-C and Sepsis-Related Adverse Outcomes

This supplementary material has been provided by the authors to give readers additional information about their work.

## **eMethods. Data Sources and Analyses**

### **Data sources**

Data were obtained from the Synthetic Derivative, a database that contains a de-identified copy of the EHR for every patient in the Vanderbilt University Medical Center (VUMC) system, a large teaching hospital and its affiliated network (N>2.5 million). This de-identified EHR is scrubbed of all Health Insurance Portability and Accountability Act (HIPAA) identifiers. It incorporates diagnostic and procedure codes, demographics, clinical notes, patient history, problem lists, laboratory values and medications from which researchers can extract phenotypes such as diagnoses, treatments, and outcomes.<sup>1-3</sup> ICD9 and ICD10 codes were used for outcomes and ICD9 codes for cohort construction and covariates.

### **EHR-based sepsis algorithm**

Sepsis was defined as concurrent infection and organ dysfunction (according to Sepsis-3) occurring within one day of hospital admission (days -1, 0, and +1) using an algorithm to detect sepsis using EHR data<sup>4</sup> with minor modifications. The modifications were as follows: (1) the original algorithm only included ICD9 codes for septic shock; we also included ICD10 codes for septic shock (ICD10 codes R65.20 and R65.21); (2) vasopressor initiation was identified by use of levophed (norepinephrine bitartrate) or use of dobutamine or dopamine and a billing code for administration of a vasopressor (ICD9-CM procedure code 00.17 or ICD10-PCS Procedure codes 3E033XZ, 3E043XZ, 3E053XZ and 3E063XZ) because dobutamine or dopamine alone had low specificity for identifying patients in whom it was used as a pressor; (3) we did not use serum lactate levels as a criterion because they were seldom available; (4) we excluded individuals who had scheduled cardiothoracic surgery, because the algorithms did not reliably identify the reason for artificial ventilation or ICU admission and some of these patients had an infection and received an antibiotic.

### **Manual Chart Review**

We manually reviewed EHRs to confirm phenotyping, including (1) 13 with very low LDL-C levels, (2) 4 with an extremely long hospital admission, (3) 6 with very high LDL-C levels, and (4) the performance of the sepsis criteria in 50 EHRs. All patients reviewed met the inclusion and exclusion criteria, outlier variables were not errors, and outcomes criteria performed well (**Supplementary Table 8**). We also confirmed in-hospital death by manually reviewing the records of all 82 individuals who had baseline LDL-C levels measured and who died during hospitalization.

### **Genetic risk score for LDL-C**

Genotype imputation was conducted on the Michigan Imputation server<sup>5</sup> with minimac3,<sup>23</sup> using the Haplotype Reference Consortium reference panel, version r1.1.<sup>6,7</sup> We generated a GRS for LDL-C using 81 SNPs independently associated ( $p < 5 \times 10^{-8}$ ) with LDL-C in the meta-analysis of genome wide studies performed by the Global Lipids Genetics Consortium (GLGC) (**Supplementary Table 5, Supplementary Methods**).<sup>7</sup> For each SNP, the estimated effect size and strength of association were obtained.<sup>8</sup> Genotypes were extracted from imputed genotype data for 7804 Whites. The GRS was calculated for each individual by adding the number of minor alleles (0, 1, or 2) weighted for the effect size ( $\beta$ ) of the SNP-LDL association. The association between the LDL GRS and LDL-C levels was validated in an independent cohort of 4313 white subjects who had LDL-C levels measured and had been genotyped. None of them were included in our LDL GRS cohort. To further confirm the validity of LDL-C GRS, we used logistic regression to test associations between the GRS and candidate phecodes, 272.1 (hyperlipidemia) and 411.4 (coronary atherosclerosis), within whites from the Synthetic Derivative.

## eReferences

1. Wei W-Q, Denny JC. Extracting research-quality phenotypes from electronic health records to support precision medicine. *Genome Med.* 2015;7(1):41. doi:10.1186/s13073-015-0166-y
2. Xu H, Stenner SP, Doan S, Johnson KB, Waitman LR, Denny JC. MedEx: a medication information extraction system for clinical narratives. *J Am Med Inf Assoc.* 2010;17:19-24. doi:17/1/19 [pii] 10.1197/jamia.M3378
3. Denny JC, Bastarache L, Ritchie MD, et al. Systematic comparison of phenome-wide association study of electronic medical record data and genome-wide association study data. *Nat Biotechnol.* 2013;31(12):1102-1110. doi:10.1038/nbt.2749
4. Rhee C, Dantes R, Epstein L, et al. Incidence and Trends of Sepsis in US Hospitals Using Clinical vs Claims Data, 2009-2014. *JAMA.* 2017;318(13):1241-1249. doi:10.1001/jama.2017.13836
5. Das S, Forer L, Schönherr S, et al. Next-generation genotype imputation service and methods. *Nat Genet.* 2016;48(10):1284. doi:10.1038/ng.3656
6. Consortium the HR, McCarthy S, Das S, et al. A reference panel of 64,976 haplotypes for genotype imputation. *Nat Genet.* 2016;48(10):1279. doi:10.1038/ng.3643
7. Do R, Willer CJ, Schmidt EM, et al. Common variants associated with plasma triglycerides and risk for coronary artery disease. *Nat Genet.* 2013;45(11):1345-1352. doi:10.1038/ng.2795
8. Global Lipids Genetics Consortium. Discovery and refinement of loci associated with lipid levels. *Nat Genet.* 2013;45(11):1274-1283. doi:10.1038/ng.2797

## eFigure. Outline of Cohort Identification

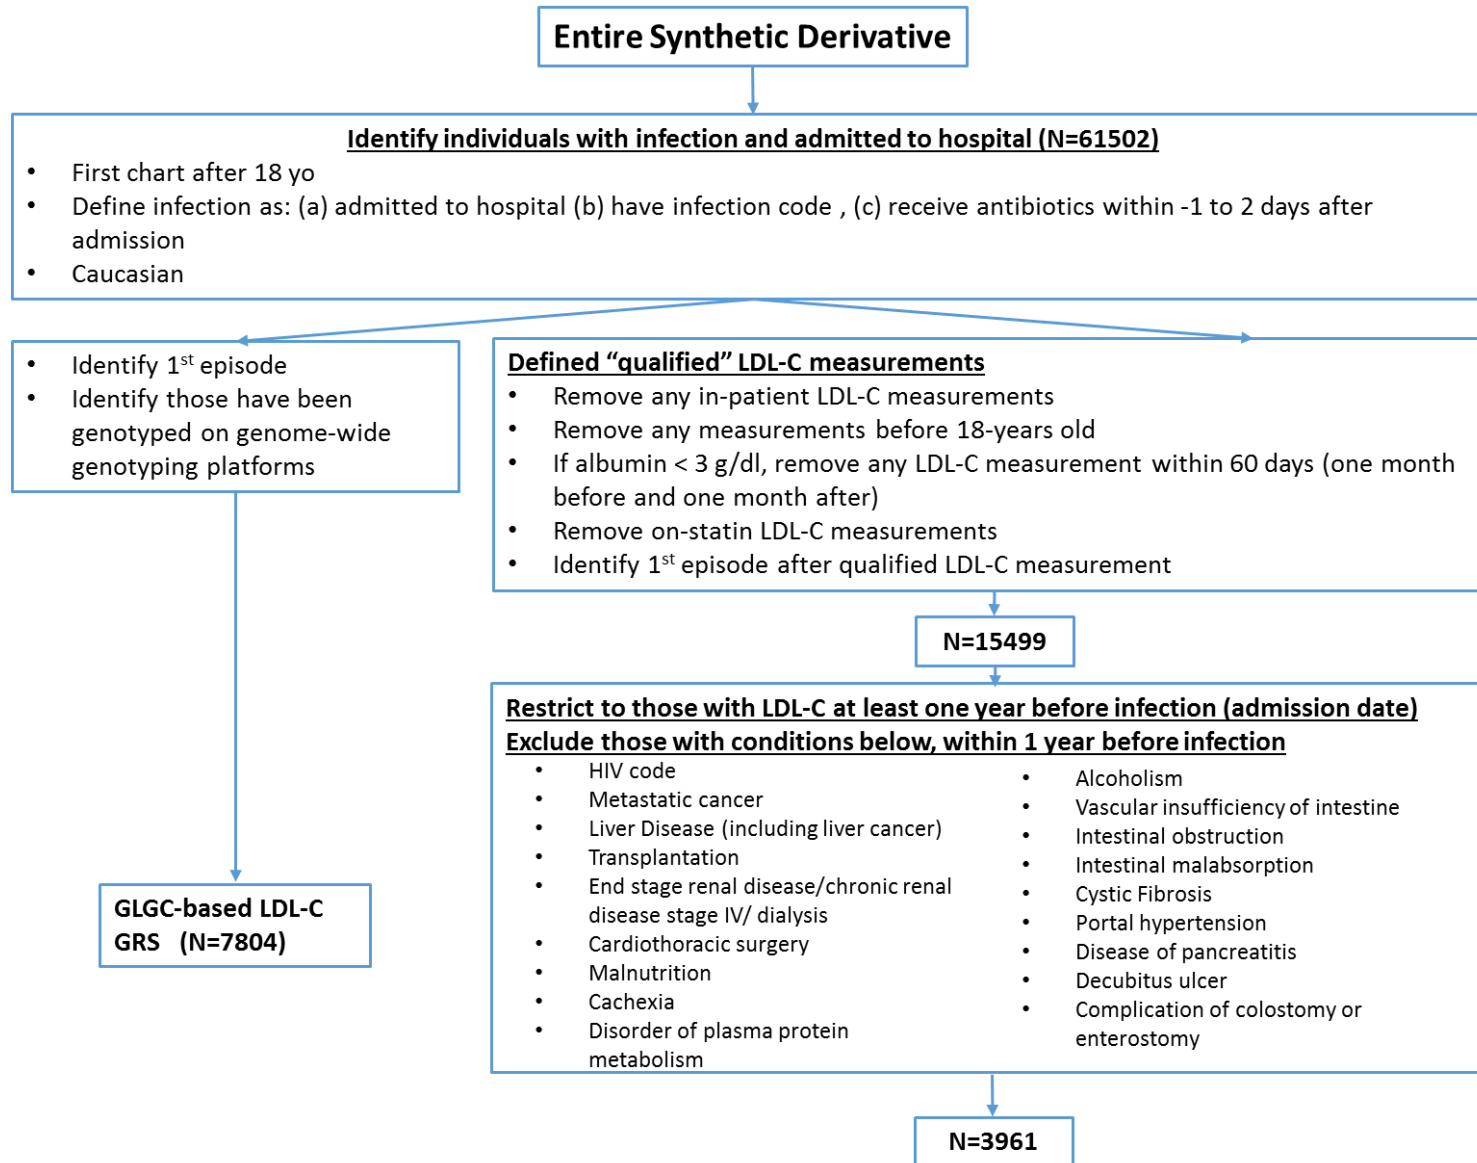

**eTable 1. List of ICD-9 Codes to Identify Individuals Hospitalized With Infection**

|                                                                                  |                                                              |
|----------------------------------------------------------------------------------|--------------------------------------------------------------|
| 001, Cholera                                                                     | 510, Empyema                                                 |
| 002, Typhoid/paratyphoid fever                                                   | 513, Lung/mediastinum abscess                                |
| 003, Other salmonella infection                                                  | 540, Acute appendicitis                                      |
| 004, Shigellosis                                                                 | 541, Appendicitis not otherwise specified                    |
| 008, Intestinal infection not otherwise classified                               | 542, Other appendicitis                                      |
| 009, Ill-defined intestinal infection                                            | 562.01, Diverticulitis of small intestine without hemorrhage |
| 023, Brucellosis                                                                 | 562.03, Diverticulitis of small intestine with hemorrhage    |
| 027, Other bacterial zoonoses                                                    | 562.11, Diverticulitis of colon without hemorrhage           |
| 032, Diphtheria                                                                  | 562.13, Diverticulitis of colon with hemorrhage              |
| 033, Whooping cough                                                              | 566, Anal and rectal abscess                                 |
| 034, Streptococcal throat/scarlet fever                                          | 567, Peritonitis                                             |
| 035, Erysipelas                                                                  | 569.5, Intestinal abscess                                    |
| 036, Meningococcal infection                                                     | 569.83, Perforation of intestine                             |
| 038, Septicemia                                                                  | 572.0, Abscess of liver                                      |
| 039, Actinomycotic infections                                                    | 572.1, Portal pyemia                                         |
| 040, Other bacterial diseases                                                    | 575.0, Acute cholecystitis                                   |
| 041, Bacterial infection in other diseases not otherwise specified               | 590, Kidney infection                                        |
| 098, Gonococcal infections                                                       | 597, Urethritis/urethral syndrome                            |
| 320, Bacterial meningitis                                                        | 599.0, Urinary tract infection not otherwise specified       |
| 322, Meningitis, unspecified                                                     | 601, Prostatic inflammation                                  |
| 324, Central nervous system abscess                                              | 614, Female pelvic inflammation disease                      |
| 420, Acute pericarditis                                                          | 615, Uterine inflammatory disease                            |
| 421, Acute or subacute endocarditis                                              | 616, Other female genital inflammation                       |
| 461, Acute sinusitis                                                             | 681, Cellulitis, finger/toe                                  |
| 462, Acute pharyngitis                                                           | 682, Other cellulitis or abscess                             |
| 463, Acute tonsillitis                                                           | 683, Acute lymphadenitis                                     |
| 464, Acute laryngitis/tracheitis                                                 | 686, Other local skin infection                              |
| 465, Acute upper respiratory infection of multiple sites/not otherwise specified | 711.0, Pyogenic arthritis                                    |
| 481, Pneumococcal pneumonia                                                      | 730, Osteomyelitis                                           |
| 482, Other bacterial pneumonia                                                   | 790.7, Bacteremia                                            |
| 485, Bronchopneumonia with organism not otherwise specified                      | 996.6, Infection or inflammation of device/graft             |
| 486, Pneumonia, organism not otherwise specified                                 | 998.5, Postoperative infection                               |

|                                                                          |                                                                          |
|--------------------------------------------------------------------------|--------------------------------------------------------------------------|
| 491.21, Acute exacerbation of obstructive chronic bronchitis             | 999.3, Infectious complication of medical care not otherwise classified. |
| 494, Bronchiectasis                                                      |                                                                          |
| Note: whenever 3- or 4- digits were listed, all sub-codes were included. |                                                                          |

**eTable 2. List of Antibiotics****List of antibiotics**

|                          |                  |               |
|--------------------------|------------------|---------------|
| Amikacin                 | Amoxicillin      | cefalexin     |
| Amphotericin B           | ceftriaxone      | cefadroxil    |
| Ampicillin               | tazobactam       | tazobactam    |
| Azithromycin             | levofloxacin     | oxacillin     |
| Bacitracin               | doxycycline      | dicloxacillin |
| Capreomycin              | ciprofloxacin    | nafacillin    |
| Cefuroxime               | metronidazole    | carbenicillin |
| Chloramphenicol          | sulfamethoxazole | piperacillin  |
| Chlortetracycline        | trimethoprim     | ticarcillin   |
| Clindamycin              | cephalexin       | sulbactam     |
| Colistin                 | tetracycline     | clavalanate   |
| Cycloserine              | cefuroxime       | gatifloxacin  |
| Erythromycin             | cefdinir         | norfloxacin   |
| fidaxomicin              | moxifloxacin     | lomefloxacin  |
| Gentamicin Sulfate (USP) | clarithomycin    | moxifloxacin  |
| Gramicidin               | lincomycin       | trovafloxacin |
| Griseofulvin             | dalbavancin      | sparfloxacin  |
| Kanamycin                | oritavancin      |               |
| Natamycin                | telavancin       |               |
| Neomycin                 | imipenem         |               |
| Netilmicin               | meropenem        |               |
| Nystatin                 | doripenem        |               |
| Oxytetracycline          | cefotaxime       |               |
| Paromomycin              | cefpodoxime      |               |
| Penicillin G             | cefixime         |               |
| Polymyxin B              | ceftazidime      |               |
| Rifabutin                | ceftizoxime      |               |
| Rifampin                 | cefdinir         |               |
| rifapentine              | ceftibaten       |               |
| rifaximin                | cefotetan        |               |



|              |            |  |
|--------------|------------|--|
| Streptomycin | cefaclor   |  |
| Tetracycline | loracarbet |  |
| Tobramycin   | cefepime   |  |
| Vancomycin   | cefazdin   |  |

**eTable 3. Exclusion Codes**

| PheCode |        |        | ICD9 and CPT codes |       |             |
|---------|--------|--------|--------------------|-------|-------------|
| 585.32  | 530.2  | 577.2  | 33508              | 0258T | V58.1       |
| 585.1   | 560.4  | 70.4   | 33510              | 0259T | 90780       |
| 571.51  | 573    | 559    | 33511              | 33405 | 90781       |
| 260     | 509.3  | 853    | 33512              | 33410 | 96400       |
| 585.31  | 441    | 270.38 | 33513              | 33411 | 96408       |
| 572     | 260.1  | 587    | 33514              | 33425 | 96425       |
| 571     | 707.1  | 263    | 33516              | 33426 | 96520       |
| 571.5   | 557    | 155    | 33517              | 33427 | 96530       |
| 571.8   | 536.7  | 270.3  | 33518              | 33430 | 96401-96549 |
| 571.81  | 260.22 | 573.4  | 33519              | 33460 | V42.*       |
| 317.1   | 577.1  | 155.1  | 33521              | 33463 |             |
| 577     | 573.2  |        | 33522              | 33464 |             |
| 317     | 71.1   |        | 33523              | 33465 |             |
| 260.2   | 499    |        | 33533              | 33470 |             |
| 317.11  | 260.3  |        | 33534              | 33475 |             |
| 560     | 573.5  |        | 33535              | 33530 |             |
| 585.34  | 270    |        | 33536              | 33641 |             |
|         |        |        | 33530              | 33675 |             |
|         |        |        | 33572              | 33676 |             |
|         |        |        | 35600              | 33677 |             |
|         |        |        | 0256T              | 33681 |             |
|         |        |        | 0257T              |       |             |

**eTable 4. Codes for Identification of Organ Failure**

| <b>ICD code for administration of a vasopressor</b> | <b>ICD code for ventilation</b> | <b>CPT code for ventilation</b> | <b>CPT code for ICU admission</b> |
|-----------------------------------------------------|---------------------------------|---------------------------------|-----------------------------------|
| 00.17                                               | 96.7                            | 94002                           | 99291                             |
| 3E033XZ                                             | 96.71                           | 94003                           | 99292                             |
| 3E043XZ                                             | 96.72                           | 94004                           |                                   |
| 3E053XZ                                             | 5A1935Z                         | 94656                           |                                   |
| 3E063XZ                                             | 5A1945Z                         | 94657                           |                                   |
|                                                     | 5A1955Z                         |                                 |                                   |

**eTable 5. PheCode Algorithms for Generating Comorbidity Covariates**

| Comorbidities                                                                      | Deyo's ICD-9-CM                              | phecode                                                                                                                                                                                                                                    |
|------------------------------------------------------------------------------------|----------------------------------------------|--------------------------------------------------------------------------------------------------------------------------------------------------------------------------------------------------------------------------------------------|
| Myocardial infarction                                                              | 410.x, 412.x                                 | 411.2                                                                                                                                                                                                                                      |
| Congestive heart failure                                                           | 428.x                                        | 428, 428.1, 428.2, 428.3, 428.4                                                                                                                                                                                                            |
| Peripheral vascular disease                                                        | 443.9, 441.x, 785.4,                         | 443.9, 442.1, 442.11, 791, 459.7,                                                                                                                                                                                                          |
|                                                                                    | 430.x–438.x                                  | 430, 430.1, 430.2, 430.3, 433, 433.1,<br>433.11, 433.12, 433.2, 433.21, 433.3,<br>433.31, 433.5, 433.6, 433.8,                                                                                                                             |
| Dementia                                                                           | 290.x                                        | 290, 290.1, 290.13, 290.16                                                                                                                                                                                                                 |
| Chronic pulmonary disease                                                          | 490.x–505.x, 506.4                           | 497, 496.2, 496.21, 496.1, 495, 495.2,<br>495.1, 495.11, 496.3, 500.1, 500.2, 496,<br>500                                                                                                                                                  |
| Rheumatic disease                                                                  | 710.0, 710.1, 710.4,<br>714.0–714.2, 714.81, | 709/695.42, 709.3, 709.4, 714, 714.1,<br>717                                                                                                                                                                                               |
| Peptic ulcer disease                                                               | 531.x–534.x                                  | 531, 531.1, 531.2, 531.3, 531.4, 531.5                                                                                                                                                                                                     |
| Mild liver disease                                                                 | 571.2, 571.4–571.6                           | 317.11, 70.4, 571.51, 571.6,                                                                                                                                                                                                               |
| Diabetes                                                                           | 250.0–250.7                                  | 250, 250.1, 250.2, 250.11, 250.21,<br>250.15, 250.12, 250.13, 250.22, 250.23,<br>250.24, 250.25,                                                                                                                                           |
| Hemiplegia or paraplegia                                                           | 344.1, 342.x                                 | 344, 342                                                                                                                                                                                                                                   |
| Renal disease                                                                      | 582.x, 583–583.7, 585.x,<br>586.x, 588.x     | 580.1, 580.11, 580.12, 580.14, 580.3,<br>580.32, 585.4, 585.34, 585.2, 588,<br>588.1, 588.2,                                                                                                                                               |
| Any malignancy, including lymphoma and leukemia, except malignant neoplasm of skin | 140.x–172.x,<br>174.x.–195.8,<br>200.x–208.x | 145.1-145.5, 145, 149.1-149.3, 149,<br>150,151,159.2,153.2,153.3,153,155.1,1<br>51,159.3,157,159.4,159,164,174.11,174<br>.2,230,182,180,180.1,184.1,184.11,184<br>.2,185,187.2,187,187.1,189.21,189.11,<br>189.12,190,191.11,191.1,193,194 |
| Moderate or severe liver disease                                                   | 456.0–456.21,<br>572.2–572.8                 | 454, 530.2, 571.8, 571.81                                                                                                                                                                                                                  |
| Metastatic solid tumor                                                             | 196.x–199.1                                  | 198, 198.1, 198.2, 198.3, 198.4, 198.5,<br>198.6, 198.7, 195.1                                                                                                                                                                             |
| AIDS/HIV                                                                           | 042.x–044.x                                  | 71, 71.1                                                                                                                                                                                                                                   |

**eTable 6. Manual Review Results to Confirm the Sepsis Algorithm**

| Supplementary Table. Manual review results to confirm the sepsis algorithm |                              |           |                        |           |               |           |                 |           |                     |           |                     |           |
|----------------------------------------------------------------------------|------------------------------|-----------|------------------------|-----------|---------------|-----------|-----------------|-----------|---------------------|-----------|---------------------|-----------|
|                                                                            | Severe sepsis / Sepsis shock |           | Cardiovascular failure |           | Renal failure |           | Hepatic failure |           | Hematologic failure |           | Respiratory failure |           |
|                                                                            | reviewed                     | algorithm | reviewed               | algorithm | reviewed      | algorithm | reviewed        | algorithm | reviewed            | algorithm | reviewed            | algorithm |
| <b>1 (yes)</b>                                                             | 13                           | 13        | 18                     | 18        | 18            | 17        | 21              | 19        | 21                  | 20        | 13                  | 13        |
| <b>0 (no)</b>                                                              | 37                           | 35        | 32                     | 31        | 32            | 32        | 29              | 29        | 29                  | 28        | 37                  | 34        |

Reviewed = gold standard by reviewing records

Algorithm= number correct according to algorithm

**eTable 7. Variants Used to Generate GLGC-Based LDL-C Genetic Risk Score**

| rs ID      | chr | pos       | a1 | a2 | LDL-C<br>beta |
|------------|-----|-----------|----|----|---------------|
| rs10903129 | 1   | 25641524  | A  | G  | -0.033        |
| rs1998013  | 1   | 55730618  | T  | C  | -0.38         |
| rs4587594  | 1   | 62906518  | A  | G  | -0.049        |
| rs6603981  | 1   | 92766395  | T  | C  | 0.034         |
| rs646776   | 1   | 109620053 | T  | C  | 0.16          |
| rs1010167  | 1   | 110000250 | C  | G  | -0.025        |
| rs267733   | 1   | 149225460 | A  | G  | 0.033         |
| rs2642438  | 1   | 219036651 | A  | G  | -0.035        |
| rs903319   | 1   | 219052434 | T  | C  | -0.027        |
| rs2587534  | 1   | 232915962 | A  | G  | 0.039         |
| rs1367117  | 2   | 21117405  | A  | G  | 0.12          |
| rs515135   | 2   | 21139562  | T  | C  | -0.14         |
| rs1260326  | 2   | 27584444  | T  | C  | 0.021         |
| rs3817588  | 2   | 27584716  | T  | C  | 0.026         |
| rs6544713  | 2   | 43927385  | T  | C  | 0.081         |
| rs4148218  | 2   | 43953086  | A  | G  | -0.044        |
| rs2710642  | 2   | 63003061  | A  | G  | 0.024         |
| rs17508045 | 2   | 118293189 | T  | C  | 0.049         |
| rs2030746  | 2   | 121025958 | T  | C  | 0.021         |
| rs16831243 | 2   | 135478814 | T  | C  | 0.038         |
| rs2287623  | 2   | 169538401 | A  | G  | -0.022        |
| rs1250229  | 2   | 216012629 | T  | C  | -0.024        |
| rs11563251 | 2   | 234344123 | T  | C  | 0.035         |
| rs9875338  | 3   | 12271469  | A  | G  | -0.027        |
| rs7640978  | 3   | 32508014  | T  | C  | -0.039        |
| rs17345563 | 3   | 133691893 | A  | G  | 0.036         |
| rs7703051  | 5   | 74661243  | A  | C  | 0.073         |
| rs4530754  | 5   | 122883315 | A  | G  | 0.028         |

|            |    |           |   |   |        |
|------------|----|-----------|---|---|--------|
| rs6882076  | 5  | 156322875 | T | C | -0.046 |
| rs2294261  | 6  | 16217142  | A | C | 0.033  |
| rs1800562  | 6  | 26201120  | A | G | -0.062 |
| rs2247056  | 6  | 31373469  | T | C | -0.025 |
| rs17789218 | 6  | 100706818 | T | C | 0.024  |
| rs868943   | 6  | 116444196 | A | G | -0.026 |
| rs2297374  | 6  | 160495975 | T | C | -0.033 |
| rs1564348  | 6  | 160498850 | T | C | -0.048 |
| rs12670798 | 7  | 21573877  | T | C | -0.034 |
| rs4722551  | 7  | 25958351  | T | C | -0.039 |
| rs2073547  | 7  | 44548856  | A | G | -0.049 |
| rs217386   | 7  | 44567220  | A | G | -0.036 |
| rs4240624  | 8  | 9221641   | A | G | 0.067  |
| rs10102164 | 8  | 55584167  | A | G | 0.032  |
| rs2326077  | 8  | 59548473  | T | C | -0.034 |
| rs2737252  | 8  | 116733072 | A | G | -0.031 |
| rs2980885  | 8  | 126543488 | A | G | -0.031 |
| rs7832643  | 8  | 145094645 | T | G | 0.034  |
| rs3780181  | 9  | 2630759   | A | G | 0.045  |
| rs1883025  | 9  | 106704122 | T | C | -0.03  |
| rs8176720  | 9  | 135122694 | T | C | 0.033  |
| rs579459   | 9  | 135143989 | T | C | -0.067 |
| rs2255141  | 10 | 113923876 | A | G | 0.03   |
| rs10832962 | 11 | 18612847  | T | C | 0.032  |
| rs174532   | 11 | 61305450  | A | G | 0.035  |
| rs1535     | 11 | 61354548  | A | G | 0.053  |
| rs10790162 | 11 | 116144314 | A | G | 0.076  |
| rs11220462 | 11 | 125749162 | A | G | 0.059  |
| rs653178   | 12 | 110492139 | T | C | 0.023  |
| rs6489818  | 12 | 110794963 | A | G | 0.028  |
| rs1186380  | 12 | 119860799 | T | C | -0.024 |
| rs1169288  | 12 | 119901033 | A | C | -0.038 |

|            |    |          |   |   |        |
|------------|----|----------|---|---|--------|
| rs4942486  | 13 | 31851388 | T | C | 0.024  |
| rs8017377  | 14 | 23953727 | A | G | 0.03   |
| rs9989419  | 16 | 55542640 | A | G | 0.028  |
| rs2288002  | 16 | 70614783 | A | G | -0.029 |
| rs2000999  | 16 | 70665594 | A | G | 0.065  |
| rs314253   | 17 | 7032374  | T | C | 0.024  |
| rs4791641  | 17 | 8101874  | T | C | -0.02  |
| rs7225700  | 17 | 42746803 | T | C | -0.03  |
| rs6511720  | 19 | 11063306 | T | G | -0.22  |
| rs688      | 19 | 11088602 | T | C | 0.054  |
| rs10401969 | 19 | 19268718 | T | C | 0.12   |
| rs6859     | 19 | 50073874 | A | G | 0.084  |
| rs7254892  | 19 | 50081436 | A | G | -0.49  |
| rs492602   | 19 | 53898229 | A | G | -0.029 |
| rs364585   | 20 | 12910718 | A | G | -0.025 |
| rs2328223  | 20 | 17793921 | A | C | -0.03  |
| rs7264396  | 20 | 33618155 | T | C | -0.025 |
| rs6016381  | 20 | 38613850 | T | C | 0.036  |
| rs6065311  | 20 | 39157752 | T | C | -0.042 |
| rs1800961  | 20 | 42475778 | T | C | -0.069 |
| rs5763662  | 22 | 28708703 | T | C | 0.077  |

Note: rs2954022 was removed due to multiple alleles

- The table was adopted from reference 25 (*Nat Genet.* 2013;45(11):1345-1352)



**eTable 8. Relationship Between LDL-C Concentrations and Outcomes**

| Phenotypes               | Measured baseline LDL-C, N=3961 |         |                       |         |
|--------------------------|---------------------------------|---------|-----------------------|---------|
|                          | Unadjusted                      |         | adjusted <sup>1</sup> |         |
|                          | Odds Ratio                      | P-value | Odds Ratio            | P-value |
| <b>Sepsis</b>            | 0.86 (0.79 - 0.94)              | 0.00127 | 0.95 (0.86 - 1.04)    | 0.25    |
| <b>ICU admission</b>     | 0.85 (0.76 - 0.96)              | 0.00795 | 0.97 (0.86 - 1.10)    | 0.61    |
| <b>in-hospital death</b> | 0.80 (0.63 - 1.00)              | 0.0549  | 0.98 (0.76 - 1.24)    | 0.85    |

  

| Phenotypes               | Measured baseline LDL-C, excluding those with prior infection, N=3488 |         |                       |         |
|--------------------------|-----------------------------------------------------------------------|---------|-----------------------|---------|
|                          | Unadjusted                                                            |         | adjusted <sup>2</sup> |         |
|                          | Odds Ratio                                                            | P-value | Odds Ratio            | P-value |
| <b>Sepsis</b>            | 0.85 (0.77 - 0.94)                                                    | 0.00105 | 0.95 (0.86 - 1.05)    | 0.34    |
| <b>ICU admission</b>     | 0.86 (0.76 - 0.98)                                                    | 0.025   | 0.97 (0.85 - 1.11)    | 0.69    |
| <b>in-hospital death</b> | 0.80 (0.62 - 1.02)                                                    | 0.084   | 1.01 (0.78 - 1.29)    | 0.95    |

adjusted<sup>1</sup> = adjusted for age, sex, comorbidity covariates, BMI, Trigs, HDL and EHR length;

adjusted<sup>2</sup> = adjusted for age, sex and comorbidity covariates

eTable 9. Associations Between Closest LDL-C and Sepsis-Related Adverse Outcomes

**eTable 9. Associations Between Closest LDL-C and Sepsis-Related Adverse Outcomes**

|                          |                                                   | most recent LDL-C, n=12334 |        |        |          |
|--------------------------|---------------------------------------------------|----------------------------|--------|--------|----------|
|                          |                                                   | Odd Ratio                  | 95% CI |        | P-value  |
| <b>Sepsis</b>            | <b>without adj</b>                                | 0.9069                     | 0.8713 | 0.9436 | 1.53E-06 |
|                          | <b>adj. age, sex and comorbidity index groups</b> | 0.9758                     | 0.9363 | 1.0167 | 0.24     |
| <b>ICU admission</b>     | <b>without adj</b>                                | 0.9695                     | 0.9188 | 1.0222 | 0.26     |
|                          | <b>adj. age, sex and comorbidity index groups</b> | 1.0367                     | 0.9823 | 1.0933 | 0.19     |
| <b>in-hospital death</b> | <b>without adj</b>                                | 0.8036                     | 0.7296 | 0.8833 | 7.36E-06 |
|                          | <b>adj. age, sex and comorbidity index groups</b> | 0.9176                     | 0.8329 | 1.0082 | 0.078    |
